# Supplementary material
Source: PubMed Central journal article supplement (PMC2918394)
Supplement: NIHMS212885-supplement-1_si_001.pdf [file NIHMS212885-supplement-1_si_001.pdf]

## Supporting Information

# Severe Acute Respiratory Syndrome-Coronavirus Papain-Like Novel Protease Inhibitors: Design, Synthesis, Protein-Ligand X-ray Structure and Biological Evaluation

*Arun K. Ghosh,\* Jun Takayama, Kalapala Venkateswara Rao, Kiira Ratia, Rima Chaudhuri, Debbie C. Mulhearn, Hyun Lee, Daniel B. Nichols, Surendranath Baliji, Susan C. Baker, Michael E. Johnson, and Andrew D. Mesezar*

HPLC (Table 1) and HRMS (Table 2) data of inhibitors.

**Table 1.** Purity of inhibitors

| <b>Inhibitor</b> | <b>Solvent system*</b> | <b>Retention Time (min)</b> | <b>Purity (%)</b> | <b>Column</b>                  | <b>Flow rate (mL/min)</b> |
|------------------|------------------------|-----------------------------|-------------------|--------------------------------|---------------------------|
| <b>7a</b>        | A                      | 7.5                         | 95.6              | XDB-C18 5 $\mu$ m 4.6 x 150 mm | 1.5                       |
| <b>7b</b>        | A                      | 7.7                         | 95.5              | XDB-C18 5 $\mu$ m 4.6 x 150 mm | 1.5                       |
| <b>15a</b>       | B                      | 8.7                         | 96.6              | XDB-C18 5 $\mu$ m 4.6 x 150mm  | 1.5                       |
| <b>15b</b>       | B                      | 8.6                         | 96.0              | XDB-C18 5 $\mu$ m 4.6 x 150mm  | 1.5                       |
| <b>15c</b>       | B                      | 8.6                         | 97.1              | XDB-C18 5 $\mu$ m 4.6 x 150mm  | 1.5                       |
| <b>15d</b>       | B                      | 8.8                         | 98.6              | XDB-C18 5 $\mu$ m 4.6 x 150mm  | 1.5                       |
| <b>15e</b>       | B                      | 8.9                         | 97.2              | XDB-C18 5 $\mu$ m 4.6 x 150mm  | 1.5                       |
| <b>15f</b>       | B                      | 8.5                         | 96.6              | XDB-C18 5 $\mu$ m 4.6 x 150mm  | 1.5                       |

|            |   |     |      |                               |     |
|------------|---|-----|------|-------------------------------|-----|
| <b>15g</b> | B | 8.5 | 98.3 | XDB-C18 5 $\mu$ m 4.6 x 150mm | 1.5 |
| <b>15h</b> | B | 8.6 | 96.9 | XDB-C18 5 $\mu$ m 4.6 x 150mm | 1.5 |
| <b>15i</b> | B | 8.3 | 95.8 | XDB-C18 5 $\mu$ m 4.6 x 150mm | 1.5 |
| <b>15j</b> | B | 8.4 | 98.5 | XDB-C18 5 $\mu$ m 4.6 x 150mm | 1.5 |
| <b>15k</b> | B | 8.8 | 96.1 | XDB-C18 5 $\mu$ m 4.6 x 150mm | 1.5 |
| <b>20</b>  | B | 8.4 | 95.5 | XDB-C18 5 $\mu$ m 4.6 x 150mm | 1.5 |

\*\*A = Linear gradient from 10% CH<sub>3</sub>CN, 0.05% TFA in 90% H<sub>2</sub>O to 100% CH<sub>3</sub>CN in 18 min.; B= linear gradient from 25% MeOH, 75% 0.05% TFA in water to 90% MeOH, 10% 0.05% TFA in water in 18 min.

**Table 2.** HRMS for inhibitors

|            |                                                                                                                                         |
|------------|-----------------------------------------------------------------------------------------------------------------------------------------|
| <b>15a</b> | HRMS ( <i>m/z</i> ) calcd for C <sub>26</sub> H <sub>31</sub> N <sub>2</sub> O <sub>2</sub> 403.2386, found [M+H] <sup>+</sup> 403.2388 |
| <b>15b</b> | HRMS ( <i>m/z</i> ) calcd for C <sub>26</sub> H <sub>30</sub> N <sub>2</sub> O <sub>2</sub> 402.2307, found [M] <sup>+</sup> 402.2303   |
| <b>15c</b> | HRMS ( <i>m/z</i> ) calcd for C <sub>26</sub> H <sub>30</sub> N <sub>2</sub> O <sub>2</sub> 402.2307, found [M] <sup>+</sup> 402.2299   |
| <b>15d</b> | HRMS ( <i>m/z</i> ) calcd for C <sub>26</sub> H <sub>31</sub> N <sub>2</sub> O <sub>2</sub> 403.2386, found [M+H] <sup>+</sup> 403.2390 |
| <b>15e</b> | HRMS ( <i>m/z</i> ) calcd for C <sub>26</sub> H <sub>31</sub> N <sub>2</sub> O <sub>2</sub> 403.2386, found [M+H] <sup>+</sup> 403.2394 |
| <b>15f</b> | HRMS ( <i>m/z</i> ) calcd for C <sub>26</sub> H <sub>31</sub> N <sub>2</sub> O <sub>2</sub> 403.2386, found [M+H] <sup>+</sup> 403.2392 |
| <b>15g</b> | HRMS ( <i>m/z</i> ) calcd for C <sub>26</sub> H <sub>29</sub> N <sub>2</sub> O <sub>3</sub> 417.2178, found [M+H] <sup>+</sup> 417.2178 |
| <b>15h</b> | HRMS ( <i>m/z</i> ) calcd for C <sub>26</sub> H <sub>29</sub> N <sub>2</sub> O <sub>3</sub> 417.2178, found [M+H] <sup>+</sup> 417.2173 |
| <b>15i</b> | HRMS ( <i>m/z</i> ) calcd for C <sub>25</sub> H <sub>27</sub> N <sub>2</sub> O <sub>3</sub> 403.2022, found [M+H] <sup>+</sup> 403.2025 |
| <b>15j</b> | HRMS ( <i>m/z</i> ) calcd for C <sub>25</sub> H <sub>27</sub> N <sub>2</sub> O <sub>3</sub> 403.2022, found [M+H] <sup>+</sup> 403.2025 |
| <b>15k</b> | HRMS ( <i>m/z</i> ) calcd for C <sub>27</sub> H <sub>31</sub> N <sub>2</sub> O <sub>3</sub> 431.2335, found [M+H] <sup>+</sup> 431.2330 |
| <b>20</b>  | HRMS ( <i>m/z</i> ) calcd for C <sub>25</sub> H <sub>30</sub> N <sub>3</sub> O <sub>2</sub> 404.2338, found [M+H] <sup>+</sup> 404.2336 |
